# Supplementary material
Source: PubMed Central journal article supplement (PMC2731148)
Supplement: ajpath.2009.090163_1.pdf [file ajpath.2009.090163_1.pdf]

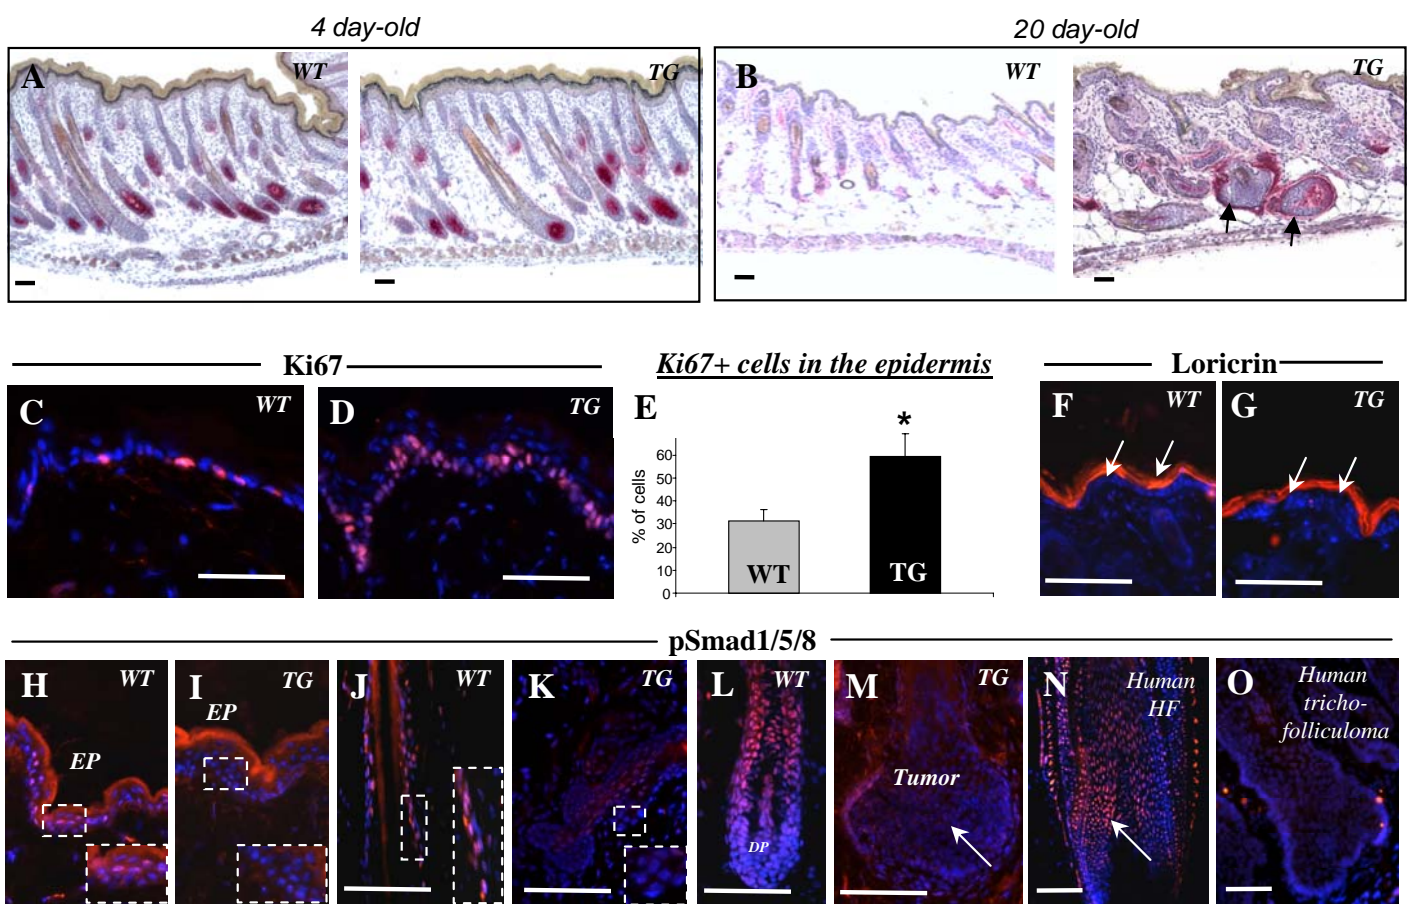

Sharov et al. Supplementary Figure 1

### Supplementary Figure 1.

At distinct time points of postnatal development (postnatal days 4, 14, 20, 30, and 6 months), cryosections of dorsal skin of WT and TG mice were processed for histoenzymatic visualization of alkaline phosphatase (**A, B**) and for immunohistochemistry (**C–O**). Statistical analyses were performed by using Student's t test,  $P < 0.05$ .

**A, B:** Histological analysis of WT and TG skin at different time points of postnatal development. Lack of visible differences between WT and TG skin at P4 (**A**). Formation of large HF-derived tumors at P20 (**B**, arrows).

**C–E:** Ki67 expression is significantly increased in epidermis of P30 TG vs WT mice.

**F, G:** Suprabasal loricrin expression in the epidermis of P30 WT and TG mice (arrows).

**H–M:** pSmad1/5/8 expression is downregulated in the epidermis (**I**) and HF-derived tumors (**K, M**, arrow) of P30 TG mice versus WT mice (**H, J, L**).

**N, O:** Decreased expression of pSmad1/5/8 in human trichofolliculoma versus normal scalp HF (arrow).
